# Supplementary material for: Insight into Molecular Interactions of Two Methyl Benzoate Derivatives with Bovine Serum Albumin
Source: MDPI journal article supplement (doi:10.3390/ijms222111705), 2021-10-28
Supplement: s1 [file s1]

**Supplementary Materials:**

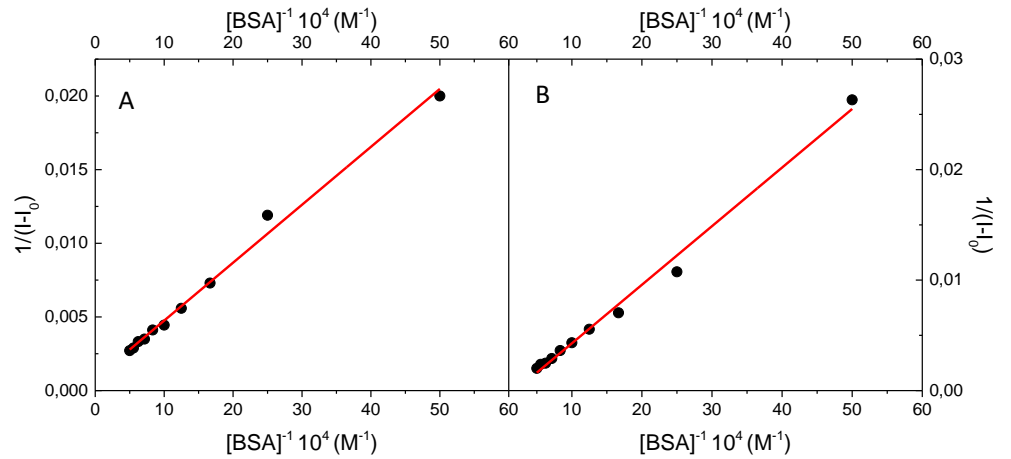

**Figure S1.** The Benesi-Hildebrand dependence ( $1/(I-I_0)$  vs.  $[BSA]^{-1}$ ) for **I** (A) and **II** (B) in phosphate buffer solutions containing different concentration of BSA.

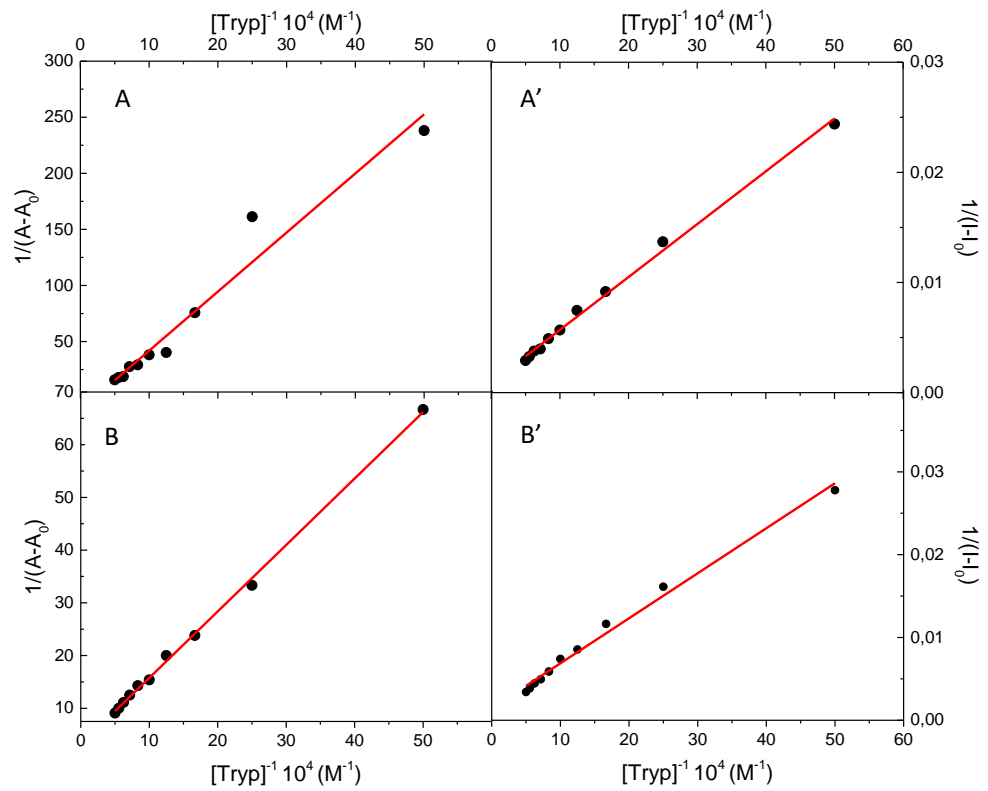

**Figure S2.** The Benesi-Hildebrand dependence ( $1/(A-A_0)$  vs.  $[Tryp]^{-1}$ ) and ( $1/(I-I_0)$  vs.  $[Tryp]^{-1}$ ) for **I** (A, A') and **II** (B, B') in phosphate buffer solutions containing different concentration of Tryp.

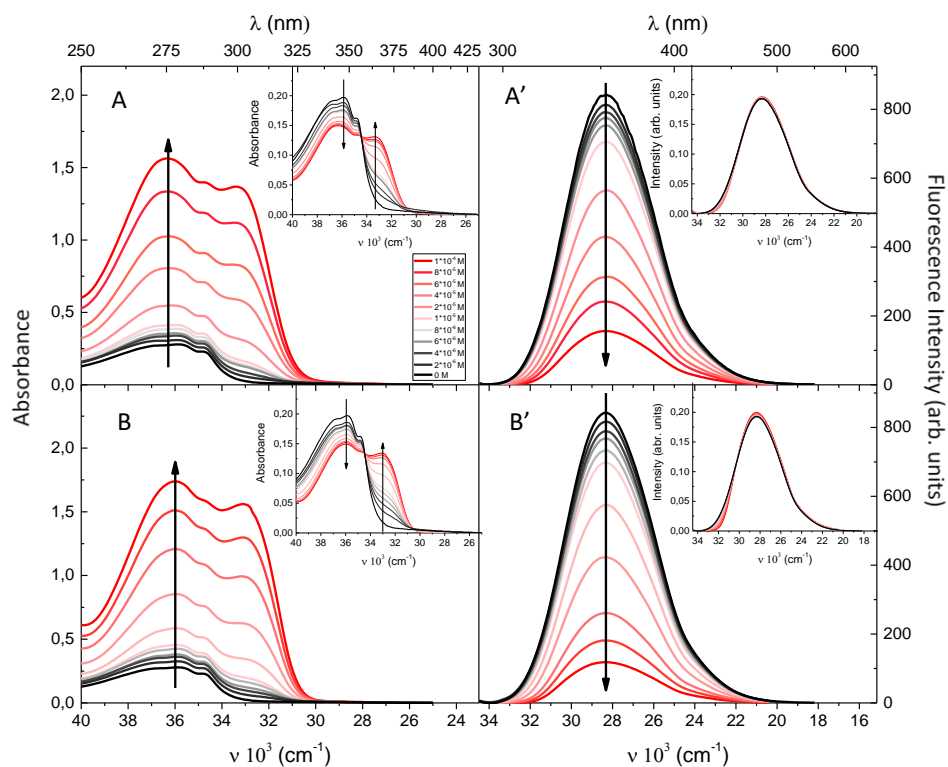

**Figure S3** Absorption and fluorescence spectra ( $\lambda_{\text{exc}}=280$  nm) of Tryp ( $c=5\cdot 10^{-5}$  M) in phosphate buffer solutions containing different concentration of **I** (A, A') and **II** (B, B') (0 M,  $2.0\cdot 10^{-6}$  M,  $4.0\cdot 10^{-6}$  M,  $6.0\cdot 10^{-6}$  M,  $8.0\cdot 10^{-6}$  M,  $1.0\cdot 10^{-5}$  M,  $1.2\cdot 10^{-5}$  M,  $1.4\cdot 10^{-5}$  M,  $1.6\cdot 10^{-5}$  M,  $1.8\cdot 10^{-5}$  M,  $2.0\cdot 10^{-5}$  M). The normalized LW absorption and fluorescence band (by scaling the area under the spectrum to be equal to unity) are presented in inserts.

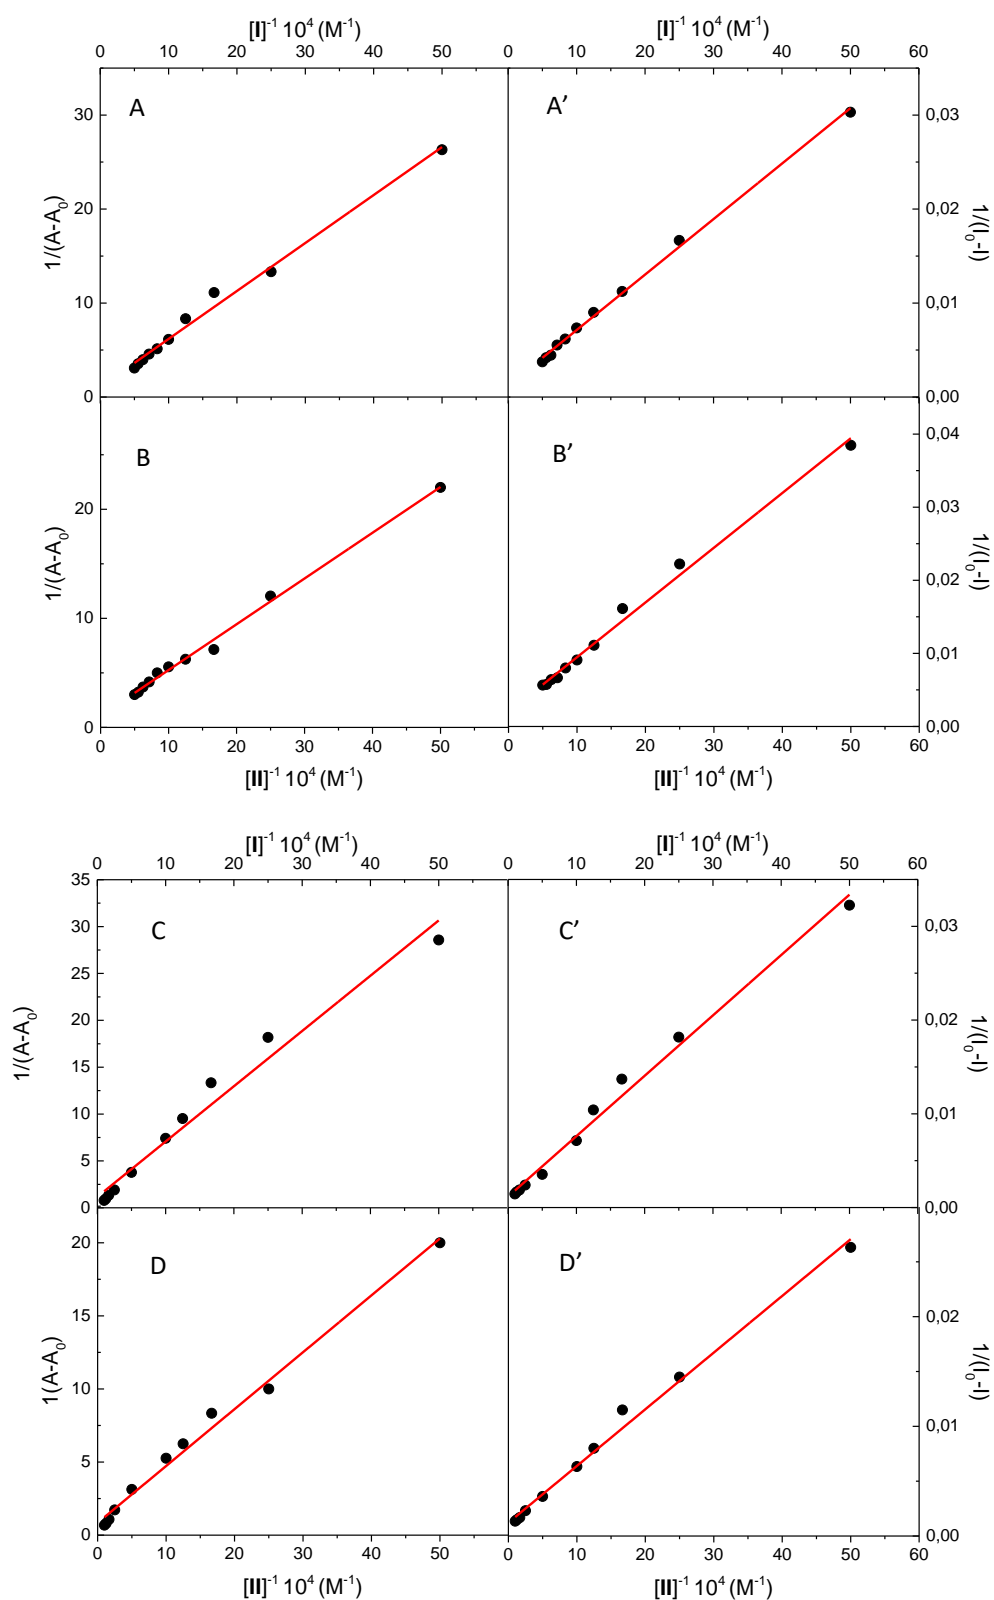

**Figure S4** The Benesi-Hildebrand dependence  $1/(A-A_0)$  vs.  $[Molecule]^{-1}$  (A, B, C, D) and  $1/(I_0-I)$  vs.  $[Molecule]^{-1}$  (A', B', C', D') for BSA-I (A, A'), BSA-II (B, B'), Tryp-I (C, C') and Tryp-II (D, D') systems in phosphate buffer solutions containing different concentration of investigated molecules.

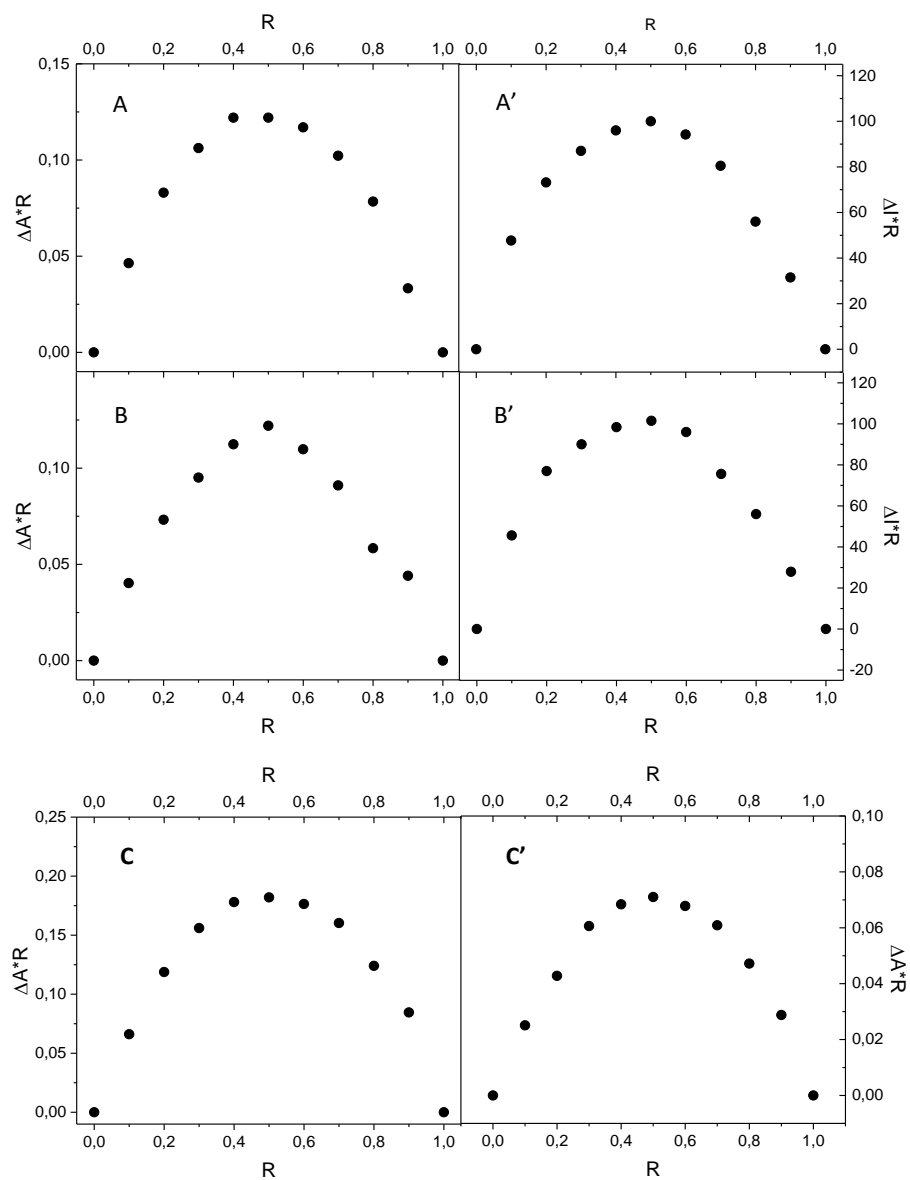

**Figure S5** Job plots of the investigated BSA-I (A, A'), BSA-II (B, B'), Tryp-I (C) and Tryp-II (C') systems prepared by using steady-state absorption (A, B, C) and fluorescence (A', B', C') data.
